# Supplementary material for: Sonodynamic-chemotherapy synergy with chlorin e6-based carrier-free nanoparticles for non-small cell lung cancer
Source: Royal Society of Chemistry journal article supplement (doi:10.1039/d4tb00009a), 2024-01-01
Supplement: d4tb00009a1.pdf [file d4tb00009a1.pdf]

## Electronic Supplementary Information

### Sonodynamic-Chemotherapy Synergy with Chlorin e6-based Carrier-free Nanoparticles for Non-Small Cell Lung Cancer

Shuangyu Tian<sup>a,b</sup>, Jinghang Li<sup>a,b</sup>, Dongdong Wang<sup>a</sup>, Yingchao Han<sup>a</sup>, Honglian Dai<sup>a</sup>, and  
Lesan Yan<sup>a,b,c\*</sup>

<sup>a</sup> State Key Laboratory of Advanced Technology for Materials Synthesis and Processing, Biomedical Materials and Engineering Research Center of Hubei Province, Wuhan University of Technology, Wuhan, 430070, China.

<sup>b</sup> School of Chemistry, Chemical Engineering and Life Science, Wuhan University of Technology, Wuhan 430070, China

<sup>c</sup> Wuhan University of Technology Advanced Engineering Technology Research Institute of Zhongshan City, Zhongshan 528400, China

E-mail: lsyan@whut.edu.cn

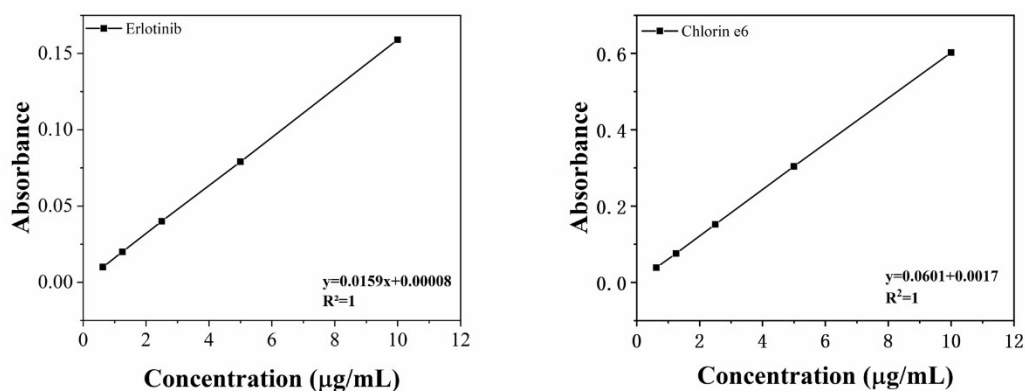

Fig. S1 UV absorption standard curve of Erlotinib and Chlorin e6.

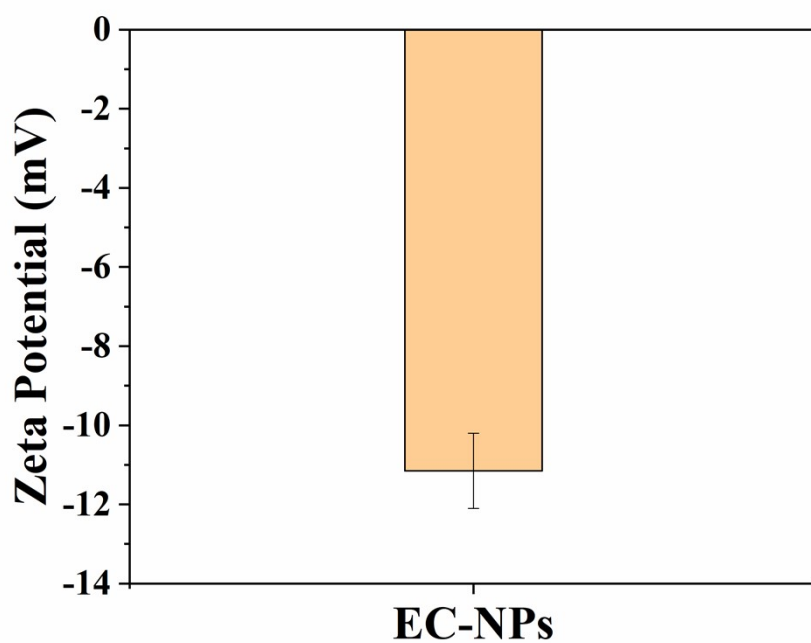

Fig. S2 Zeta potential of EC-NPs.

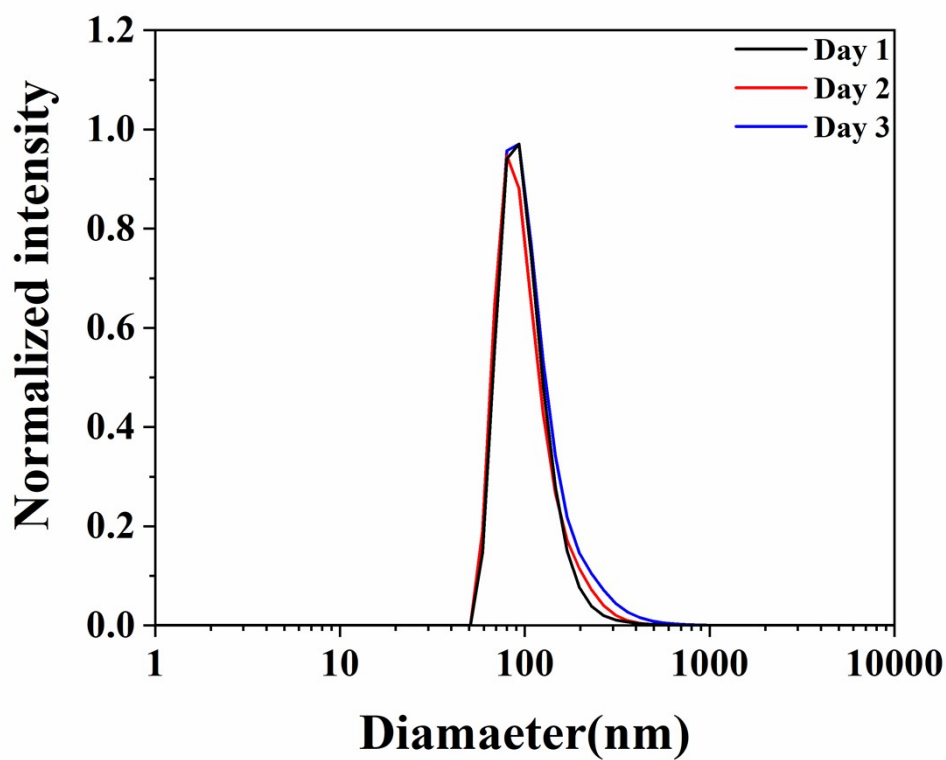

Fig. S3 Changes in particle size of EC-NPs in a solution containing 10% serum within 3 days.

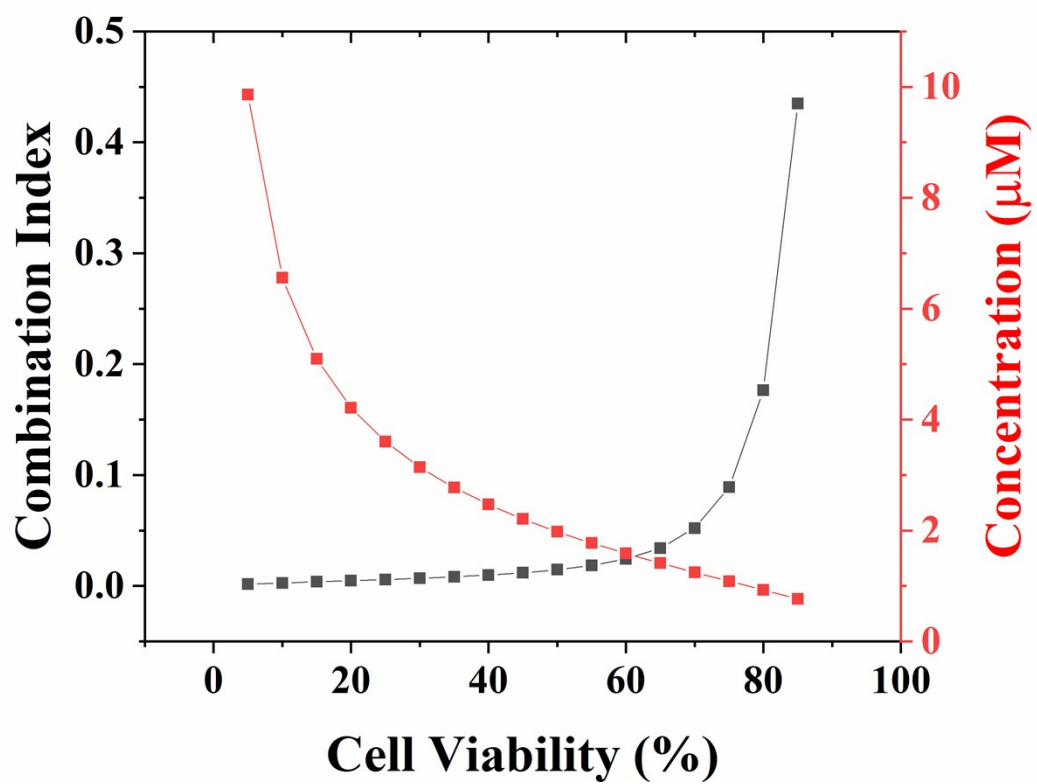

Fig. S4 The relationship between the Combination Index of EC-NPs, cell viability, and drug concentration.
